# Supplementary material
Source: publisher figshare collection journal article supplement (https://frontiersin.figshare.com/ndownloader/files/18540554)
Supplement: Supplementary file 1 [file 18540554]

**Supplemental 2. Expert Elicitation Process and Results**

**Expert Elicitation Process**

To ensure our threats and conservation analyses were rigorous and based on the best available science, we[[1]](#footnote-1) sought expert input to parameterize several aspects of the model. The use of expert opinion to inform decision-making in the face of uncertainty is a long-standing practice (e.g., Keeney and Winterfeldt 1989, Cleaves 1994, Ayyub 2001, Cooke and Goossens 2004, Garthwaite et al. 2005, Martin et al. 2005, MacMillan and Marshall 2006). Although expert knowledge can provide a wealth of otherwise unavailable information, eliciting such information needs to be done with care due to a host of biases that can arise if done naively (Drescher et al. 2013). We followed widely-accepted best practices in planning, preparing, eliciting, and synthesizing expert judgments (Hemming et al. 2017).

We held four expert meetings to better parameterize our monarch models:

1. Eastern monarch population demography & threats - meeting held in Bloomington, MN 13-15 June 2017
2. Western population demography & threats - meeting held in Portland, OR 16-18 October 2017
3. Quasi-extinction threshold levels – 2 virtual elicitations: February 2018 and March 2019.

***Expert Selection***

To select experts, we identified specific areas of expertise needed to fill critical data gaps. These gaps were: insecticides and butterfly toxicology, climate change, monarch habitat requirements, monarch-specific and butterfly diseases, habitat loss, monarch biology, population trends, and migratory ecology. We compiled a list of persons with substantive expertise by searching the literature and querying known experts. We identified 52 experts across expertise topics. From a practical perspective, we wanted to keep the number of experts to fewer than 15. We narrowed the list of experts based on their level of expertise and whether they are still actively engaged in the area of expertise. We selected experts so that all aforementioned knowledge gaps were covered by multiple experts and covered the entire North American range. We then ensured the group included a diversity of perspectives on known contentious issues (e.g., milkweed limiting hypothesis), affiliations, and demographics (gender & race); the latter two are believed to be important for effective, robust group dynamics and to minimize institutional and demographic-specific biases (Burgman et al. 2016).

***Expert Preparation***

To motivate and calibrate experts for the upcoming exercises, we explained the impetus for the meeting, the expected outcomes of the meeting, and the specific use of their input. To foster rigorous performance, we talked about the common cognitive tendencies and biases associated with forecasting and expert elicitation in general. Lastly, we used ‘seed’ questions to practice the elicitation method prior to eliciting expert responses.

***Questions for Experts***

To assist us with model parameterization for the eastern and western populations, we elicited expert input on the primary drivers that led to the current monarch population status, the relative contribution of each driver to the current condition of the population, and finally, the functional relationships between monarch population size and varying states of influences. For the latter, we elicited the expected proportional change in population size (∆N) given varying levels of increases and decreases in the primary drivers.

***Elicitation Exercises***

Expert input was elicited through facilitated discussions, and when applicable, the 4-step elicitation method, which minimizes anchoring and over-confidence concerns (Speirs-Bridge et al., 2010). The 4-step method entails asking experts to **first** provide their lowest and highest reasonableestimates for the variable in question, followed by their level of confidence (50-100%) that the true value of the variable falls within their stated range (lowest to highest values), and **lastly**, the most likely estimate. Our general approach was to: 1) explain the question being posed, 2) ask the experts to independently complete the 4-step exercise, 3) compile, summarize, and share the results with the experts, 4) facilitate discussion among the experts, and 5) allow the experts to revise their values, if desired. Steps 2 – 5 were repeated until the experts felt comfortable with their responses and no new information was forthcoming during the discussion.

Although experts were readily comfortable with identifying themselves, we maintained anonymity by displaying summary statistics: the median ‘most likely’ value across the experts and the ‘lowest’ and ‘highest’ values among them. We highlighted areas of substantial difference and sought explanations for the range in opinions. To guard against over-confidence, we asked experts whether there could be plausible scenarios which may lead to values outside the bounds of their responses. Experts were asked to document their underlying premises within their worksheets and were encouraged to share their rationales during discussion. The purposes of this discussion were to share knowledge among the experts and to allow experts to query one another about outcomes. We repeatedly emphasized that we were not seeking consensus, but rather, we wanted their individual expert judgment based on their experience and the collective knowledge of the experts assembled. The discussions allowed us to better understand the sources for the differences in their opinions, identify and reconcile misunderstandings of the question or discrepancies in their knowledge base, and document the breadth of uncertainty.

**Expert Elicitation Results Summary – Western Population workshop**

We hosted an in-person meeting in October 2017; 8 of the 10 invited experts were able to participate (see below). We presented the state-of-knowledge for western population as we know it and sought out clarifications through facilitated discussion. Specifically, we discussed:

1. The drivers (influences) of the western monarch decline
2. The primary habitat parameters that influence population growth (e.g., milkweed, nectar, overwintering habitat)
3. The extent of migration to and from Mexico
4. The specific habitat requirements for overwintering sites
5. The options for repairing and enhancing degraded overwintering sites
6. The mechanisms for selecting overwintering sites
7. The degree of inter-generational philopatry

*Louie Yang (Univ. of California-Davis) participated in the first day discussions

To obtain information for the western population model, we elicited expert input on the primary drivers that led to the current condition of the western population, future influence of those drivers, and the expected population response given various states of the drivers. The results from the elicitation are summarized below.

*Past & Current Influences*

Prior to the expert meeting, the SSA team identified, consolidated, and ranked 18 drivers cited in the literature. Through discussion the experts refined the list to 6 primary drivers (Table 1). Next, we elicited the relative contribution of each driver to the current condition of the western population. We asked them to first rank the drivers in terms of the magnitude of influence (1 = most influential) and then to assign the proportional weight of each influence using their rank order as a guide (must sum to 1). We completed 3 elicitation rounds; the aggregated responses for Round 3 are presented in Figure 1.

Table 1. List of the influences primarily responsible for driving the western monarch population trends. Climate change (referred to as “non-stationary environmental conditions”) was subdivided into habitat and non-habitat effects.


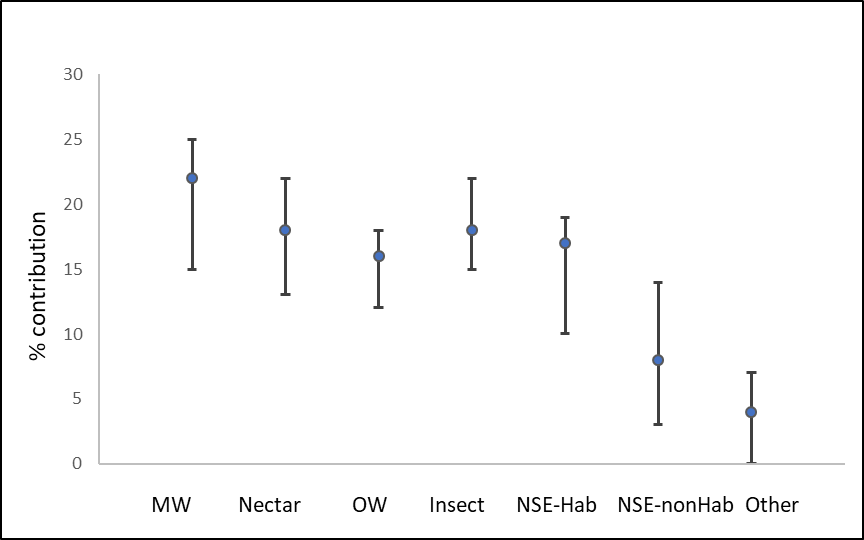


Figure 1. The range in aggregated experts’ values for % contribution of each influence to the current condition of the western monarch population. Error bars= the ‘lowest’ and ‘highest’ values, respectively, among the experts; Dot = the median ‘most likely’ value across experts. See Table 1 for x-axis label codes.

To predict monarch population response to future changes in the magnitude and frequency of the drivers (referred to as future scenarios), we elicited the functional relationship between monarch population size and varying states of the drivers. Specifically, we elicited the expected percent change in population size given varying levels of increases and decreases in milkweed, nectar, and over-winter habitats. For insecticides, we elicited qualitative scenarios that would need to occur for the magnitude of influence to remain unchanged, decrease, and increase over the next 20 years. For climate change, we facilitated a discussion about the mechanisms of and expected monarch response due to a changing climate. Lastly, to help develop plausible future scenarios of the drivers, we asked the experts to predict the change in magnitude of influence of each driver over the next 20 years.

*Population Response*

Using the 4-step methodology, we elicited the functional relationships between change in population size, N, and varying levels of increasing and decreasing milkweed, nectar, and overwintering habitat. For example, to elicit the population response to changes in milkweed resources, we asked:

1. Given the specified change in abundance and quality of milkweed in the West, what would be the most plausible [worst, best] response in N?
2. How confident are you (50-100 %) that your range from the lower to upper bound captures the true value?
3. Given the specified change in abundance and quality of milkweed, what would be the most likely response in N?

We completed two rounds of elicitation. The aggregated values (median value across experts) for the final round are presented in Tables 2a-c.

Table 2a. The aggregated (median across the experts) expected population response (% change in population size, N) corresponding to varying changes in milkweed. Lowest = the lowest value it could reasonably be; Highest= the highest value it could reasonably be; Most Likely = the value most likely. Median = median value across experts; Min, Max = lowest and highest values among the experts, respectively.

Table 2b. The aggregated (median across the experts) expected population response (% change in population size, N) corresponding to varying changes in nectar. Lowest = the lowest value it could reasonably be; Highest= the highest value it could reasonably be; Most Likely = the value most likely. Median = median value across experts; Min, Max = lowest and highest values among the experts, respectively.

Table 2c. The aggregated (median across the experts) expected population response (% change in population size, N) corresponding to varying changes in overwintering habitat. Lowest = the lowest value it could reasonably be; Highest= the highest value it could reasonably be; Most Likely = the value most likely. Median = median value across experts; Min, Max = lowest and highest values among the experts, respectively. .

*Future State of Influences*

We completed 2 elicitation rounds to garner expert insights on the magnitude of impact drivers are likely to have into the future. Specifically, using the 4-step method, we asked experts to provide reasonable lowest, highest, and most likely percent change in influence over the next 20 years. The range in aggregated (median across the experts) values for the final round are presented in Figure 2.


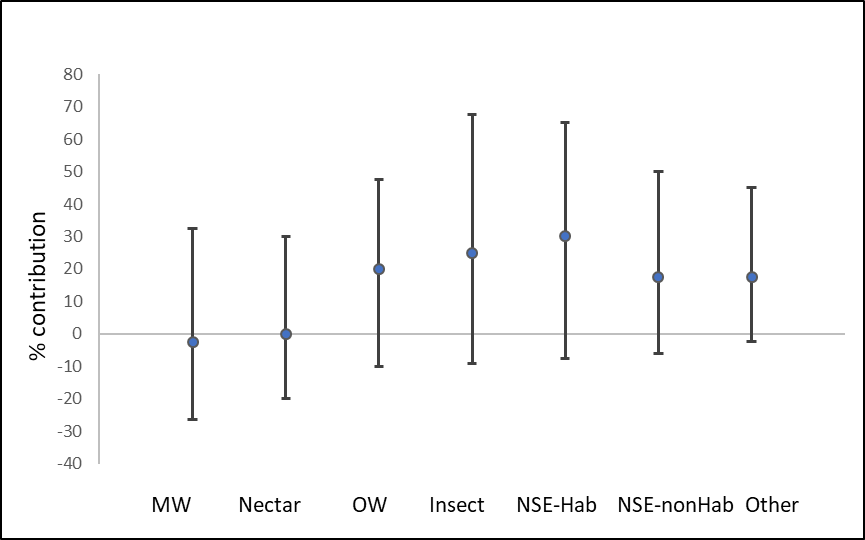


Figure 2. The range in aggregated (median value across the experts) values for the expected % change in the contribution of the influences over the next 20 years. Error bars= the ‘lowest’ and ‘highest’ values, respectively, among the experts; Dot = the median ‘most likely’ value across experts. See Table 1 for x-axis label codes.

**Expert Elicitation Results Summary – Eastern Population workshop**

We hosted an in-person meeting in June 2017; 11 of the 15 invited experts were able to participate (see below). We presented the state-of-knowledge for eastern population as we know it and sought out clarifications through facilitated discussion. We elicited the primary drivers that led to the current eastern population status and discussed these influences. We then elicited the relative contribution of each influence to the current condition of the western population. Next, to predict monarch population response to future scenarios, we elicited the functional relationship between monarch population size and varying states of influences. Specifically, we elicited the expected percent change in population size (%∆N) given varying levels of increases and decreases in milkweed, nectar, and over-wintering habitats. The results from the elicitation are summarized below.

*Past & Current Influences*

As pre-meeting homework, we elicited a list of primary drivers that led to the current status of the eastern population. The experts identified 16 categories of influences. During the in-person meeting, we asked experts to rank the drivers in terms of the magnitude of influence (1 = most influential) and then to assign the proportional weight of each influence using their rank order as a guide (must sum to 1). After 3 elicitation rounds, 11 drivers, including an “other” category were identified and ranked. The aggregated responses for the final round are presented in Table 3 and Figure 3, respectively.

Table 3. List of the influences primarily responsible for driving the eastern monarch population.


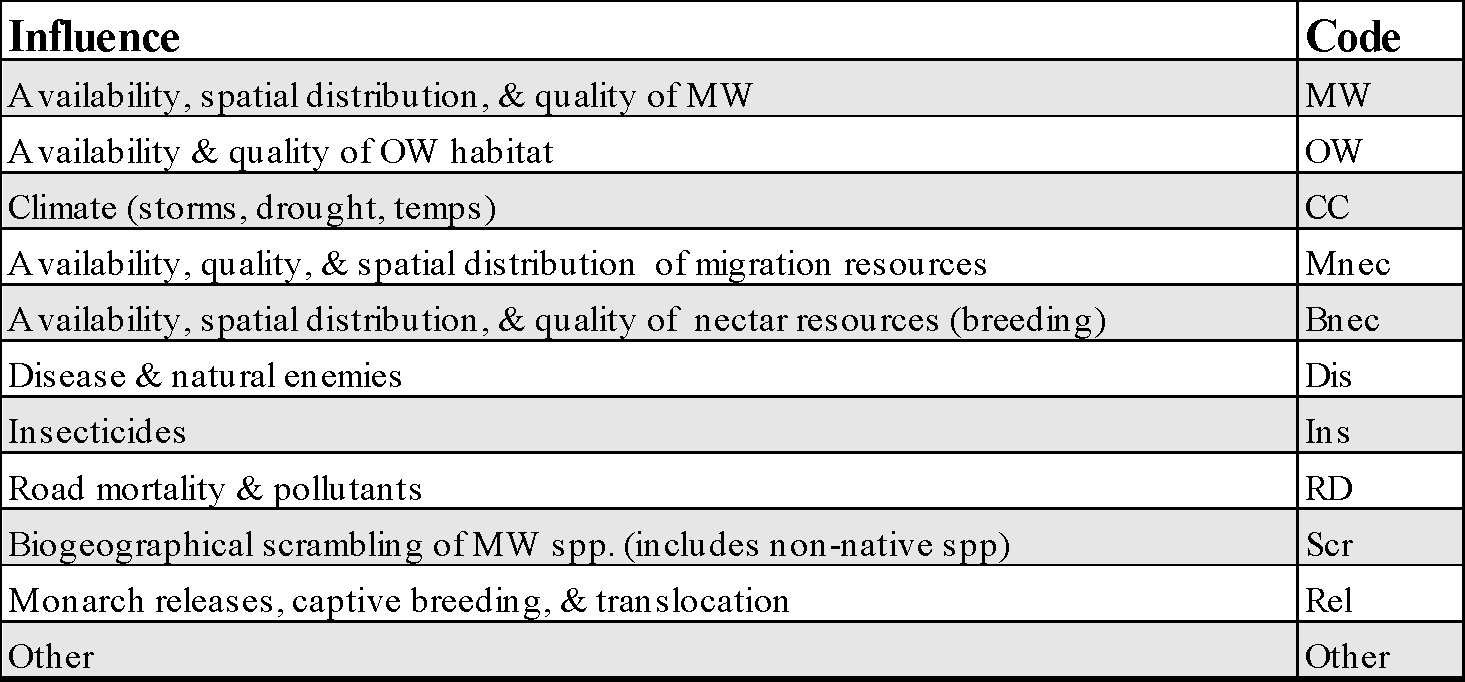


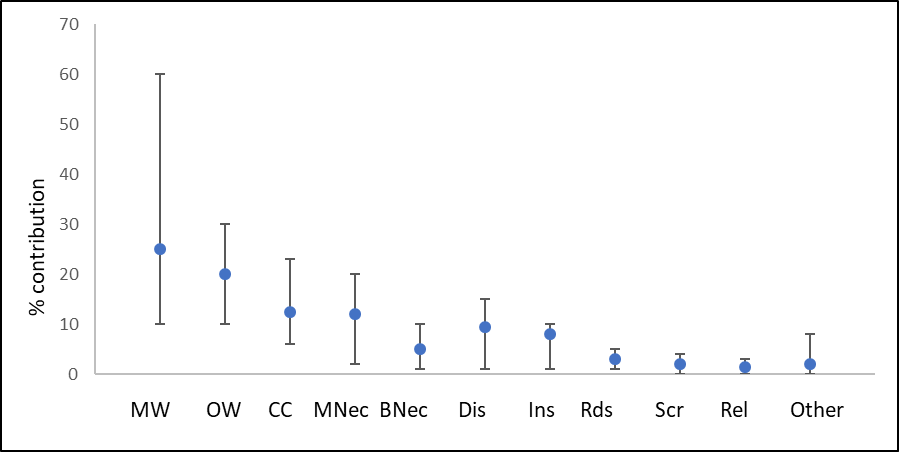


Figure 3. Range in aggregated experts’ values for % contribution of each influence to the current condition of the eastern monarch population. Error bars= the ‘lowest’ and ‘highest’ values, respectively, among the experts; Dot = the median ‘most likely’ value across experts. See Table 1 for x-axis label codes.

To predict monarch population response to future changes in the magnitude and frequency of the drivers (referred to as future scenarios), we elicited the functional relationship between monarch population size (N) and varying states of the drivers. Specifically, we elicited the expected percent change in population size given varying levels of increases and decreases in milkweed, nectar, and overwintering habitats*.* Lastly, we elicited the proportional contribution of Mexico overwintering population that originates from South, Northeast, and Northcentral regions. The results for these are presented below.

*Population Response*

Using the 4-step methodology, we elicited the functional relationships between change in population size and varying levels of increasing and decreasing over-winter habitat, migration season nectar, milkweed, and breeding season nectar. For example, to elicit the population response to changes in overwintering habitat, we asked:

1. Given the specified change in over-wintering habitat, what would be the most plausible lowest response in N?
2. Given the specified change in over-wintering habitat, what would be the most plausible highest response in N?
3. How confident are you (50-100) that your range from the lower to upper bound captures the true value?
4. Given the specified change in over-wintering habitat, what would be the most likely response in N?

We completed 2 rounds of elicitation. The aggregated values (median value across experts) for these relationships are presented in Tables 4a-d.

Table 4a. The aggregated (median across the experts) expected population response (% change in population size, N) corresponding to varying changes in overwintering habitat. Lowest = the lowest value it could reasonably be; Highest= the highest value it could reasonably be; Most Likely = the value most likely. Median = median value across experts; Min, Max = lowest and highest values among the experts, respectively.

Table 4b. The aggregated (median across the experts) expected population response (% change in population size, N) corresponding to varying changes in nectar during migration. Lowest = the lowest value it could reasonably be; Highest= the highest value it could reasonably be; Most Likely = the value most likely. Median = median value across experts; Min, Max = lowest and highest values among the experts, respectively.

Table 4c. The aggregated (median across the experts) expected population response (% change in population size, N) corresponding to varying changes in milkweed. Lowest = the lowest value it could reasonably be; Highest= the highest value it could reasonably be; Most Likely = the value most likely. Median = median value across experts; Min, Max = lowest and highest values among the experts, respectively. There is a sub-table for each of the three sub-regions comprising the eastern monarch population.

*South Sub-region*

*Northcentral Sub-region*

*Northeast Sub-region*

Table 4d. The aggregated (median across the experts) expected population response (% change in population size, N) corresponding to varying changes in breeding season nectar. Lowest = the lowest value it could reasonably be; Highest= the highest value it could reasonably be; Most Likely = the value most likely. Median = median value across experts; Min, Max = lowest and highest values among the experts, respectively. There is a sub-table for each of the three sub-regions comprising the eastern monarch population.

*South Sub-region*

*Northcentral Sub-region*

*Northeast Sub-region*

*Proportion of Influence*

Using the 4-step methodology, we elicited the proportion of the Mexican overwintering population that originates from the South, Northeast, and Northcentral sub-regions. Specifically, we asked experts “what proportion of the Mexico over-wintering population originates from each of the 3 subregions?” The results compiled across experts after two rounds of elicitation are presented in Figure 4.


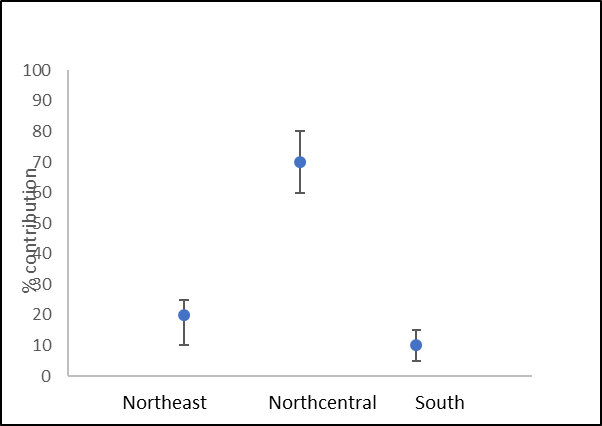


Figure 4. The range in aggregated (median values across experts) values for % contribution of each region to the overwintering population in Mexico. Error bars= the ‘lowest’ and ‘highest’ values, respectively, among the experts; Dot = the median ‘most likely’ value across experts.

**Expert Elicitation Results Summary - Quasi-extinction Threshold for Eastern Population**

We reached out to the experts in March 2018 and again in February 2019 to elicit estimates of quasi-extinction thresholds for the eastern population. In March 2018, using the 4-Step method, we asked the experts via email:

“What is the lowest/highest/most likely value for which Allee Effects begin to substantially reduce monarch viability, i.e., when survivorship or reproductive success declines to such a level that a spiral downwards towards extinction occurs”.

Table 5. Experts who participated in quasi-extinction elicitation

| **Participant** | **Affiliation** | **Expertise** |
| --- | --- | --- |
| Anurag Agrawal | Cornell University | Plant and monarch interactions |
| Sonia Altizer* | University of Georgia | Infectious disease ecology |
| Pablo Jaramillo López | National Autonomous University of Mexico | Monarch overwintering, trends |
| Sarina Jepsen | Xerces Society | Monarch biology, trends |
| Vera Krischik | University of Minnesota | Insecticides |
| Linda Fink | Sweet Briar College | Monarch behavior |
| Steve Malcolm | Western Michigan University | Plant-insect interactions |
| Karen Oberhauser | University of Minnesota | Monarch biology, migration ecology, trends |
| Ian Pearse | U.S. Geological Survey | Plant-insect interactions |
| John Pleasants* | Iowa State University | Monarch population trends |
| Cheryl Schultz | Washington State University | Butterfly population biology |
| Chip Taylor | Monarch Watch/University of Kansas | Monarch biology, migration ecology, trends |

*Altizer participated in 2018; Pleasants participated in 2019

We compiled the results and re-distributed the summary statistics and their underlying rationales. We asked the experts to review the results and their colleagues’ rationales, and we encouraged them to engage in an email discussion about their responses. We stressed that we were not looking for consensus. Following a week of discussion and reflection, we asked experts to submit their final values. The ‘lowest’ value given was 50,000; the ‘highest’ was 50 million, and the median ‘most likely’ (across the experts) was 5 million (Figure 8).


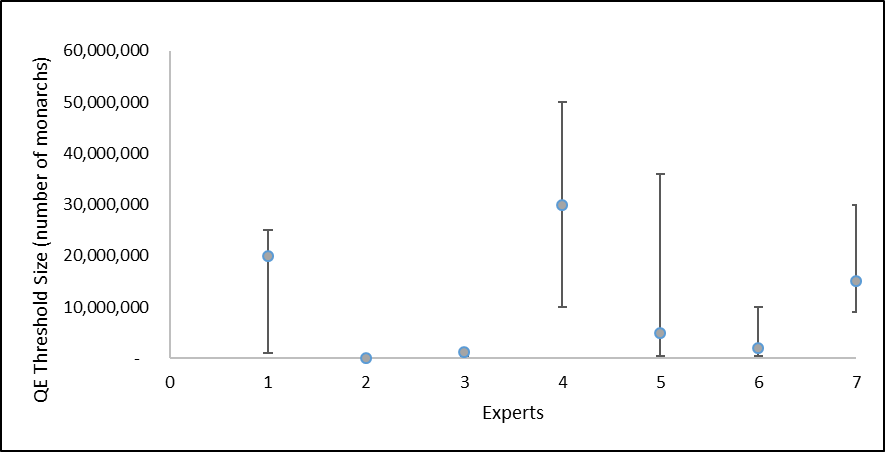
Figure 8. The 2018 experts’ values for the population number at which survivorship or reproductive success declines to such a level that a spiral downwards towards extinction occurs, i.e., quasi-extinction (QE) threshold. The range for Experts 2 and 3 are too close to graphically distinguish between the ‘most likely’ and the bounds. Expert 2: 50,000-200,000; Expert 3: 500,000-1,500,000.

In 2019, we revisited the quasi-extinction threshold question in response to the notable increase in the eastern population from 2017/18 to 2018/19. Using the 4-Step method, we asked the experts:

“At what population threshold do Allee effects and environmental stochasticity synergistically interact and prevent the species' from sustaining itself even if stressors are ameliorated. In other words, at what population size does the "extinction vortex" phenomenon begin?”

This elicitation effort involved independent work (4-step estimates and rationales) and discussion via webinar. We stressed that we were not looking for consensus. To help guard against errors, we gave an overview of the commonly used heuristics (anchoring and availability) and biases (confirmation and overconfidence) associated with expert elicitations. Following the webinar discussion and independent reflection, we asked experts to submit their final values. Some experts preferred to think in terms of area occupied, which is how the size of the eastern population is reported annually. To foster expert performance, we allowed the experts to provide their judgments in either number of butterflies or in hectares (ha); for that chose ha, we also elicited their assumed density (# butterflies/ha). The ‘lowest’ value given was 1 million (0.03 ha); the ‘highest’ was 12.8 million (0.50 ha), and the median ‘most likely’ (across the experts) was 2 million (0.15 ha) (Figures 9 and 10). For those experts that prefer numbers, we converted their number estimates to ha using a density value of 21.1 million/ha.


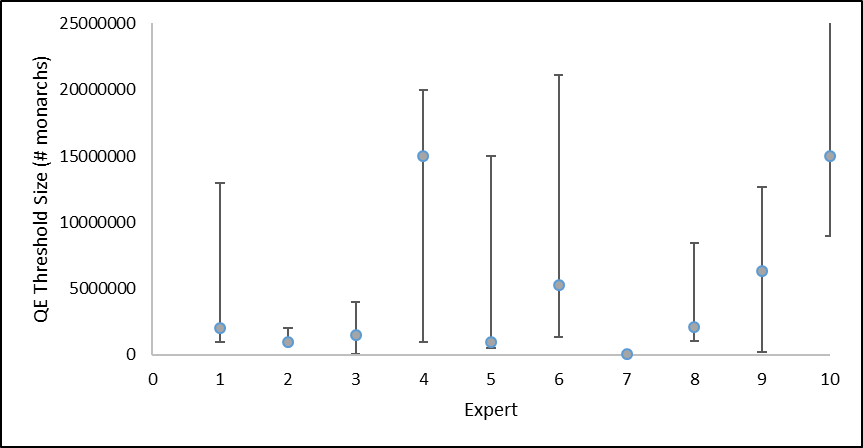
Figure 9. The 2019 experts’ values for the population number at which survivorship or reproductive success declines to such a level that a spiral downwards towards extinction occurs, i.e., quasi-extinction (QE) threshold.


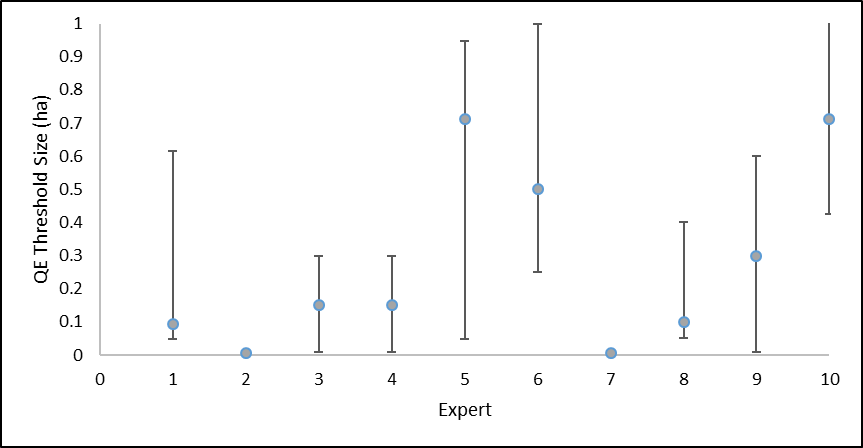
Figure 10. The experts’ values for the population size (ha occupied) at which survivorship or reproductive success declines to such a level that a spiral downwards towards extinction occurs, i.e., quasi-extinction (QE) threshold. The ranges for Experts 2 and 7 are too close to graphically distinguish between the ‘most likely’ and the bounds. Both experts: 0.005-0.01.

**Citations**

Ayyub, B.M. 2001. Elicitation of expert opinions for uncertainty and risks. CRC Press, Boca Raton, FL, USA.

Burgman, M.A. 2016.Trusting Judgements: How to get the best out of experts. Cambridge University Press. 203 pp.

Burgman, M.A., M. McBride, R. Ashton, A. Speirs-Bridge, L. Flander, B. Wintle, F. Fidler, L. Rumpff, and C. Twardy. 2011. Expert Status and Performance. PloS One 6(7):e22998. Doi:10.1371/journal.pone.0022998.

Cleaves, D.A. 1994. Assessing uncertainty in expert judgments about natural resources. General Technical Report GTR-SO-110. U.S. Dept. of Agriculture, Southern Forest Experiment Station.

Cooke, R.M, and L.H.J. Goossens. 2004. Expert judgment elicitation for risk assessments for critical infrastructures. Journal of Risk Research 7(6):643-656.

Drescher, M., A.H. Perera, C.J. Johnson, L.J. Buse, C.A. Drew, and M.A. Burgman. 2013. Toward rigorous use of expert knowledge in ecological research. Ecosphere, 4(7):1-26.

Garthwaite, P.H, J.B. Kadane, A. O'Hagan. 2005. Statistical methods for eliciting probability distributions. Journal of the American Statistical Association 100:680-701.

Goodwin P, Wright G. 2004. Decision analysis for management judgment, 3rd edition. John Wiley & Sons, West Sussex, England.

Hemming, V., M.A. Burgman, A.M. Hanea, M.F. McBride, and B.C. Wintle. 2017. A practical guide to structure expert elicitation using the IDEA protocol. Methods in Ecology and Evolution. 9:169-180.

Keeney R.L, D. von Winterfeldt. 1989. On the uses of expert judgment on complex technical problems. IEEE Transactions on Engineering Management 36(2):83-87.

MacMillan, D.C, K. Marshall. 2006. The Delphi process – an expert-based approach to ecological modeling in data-poor environments. Animal Conservation 9:11-19.

Martin, T.G, P.M. Kuhnert, K Mengersen, H.P. Possingham. 2005. The power of expert opinion in ecological models using Bayesian methods: Impact of grazing on birds. Ecological Applications 15(1):266-280.

McBride, M.F. and M.A. Burgman. 2012. What is expert knowledge, how is such knowledge gathered, and how do we use it to address questions in landscape ecology. Pg 11-38 in Expert Knowledge and Its Application in Landscape Ecology. A.H. Perera, C.A. Drew, and C.J. Johnson, eds. Springer.

Speirs-Bridge A, F. Fidler, M. McBride, L. Flander, G. Cumming, M.A. Burgman. 2010. Reducing overconfidence in the interval judgments of experts. Risk Anal 30:512–523.

1. Expert elicitation was conducted by Jennifer Szymanski (lead), Cat Darst, Lara Drizd, Kelly Nail, and Michelle Shaughnessy [↑](#footnote-ref-1)
